# Supplementary material for: Characterization of Cell Surface Glycan Profiles in Human and Mouse Corneas Using Lectin Microarrays
Source: MDPI journal article supplement (doi:10.3390/cells12192356), 2023-09-26
Supplement: s1 [file s1]

**Supplementary Table S1.** Position and glycan binding specificity of lectins in the microarray.

| <i>Symbol</i>              | <i>Lectin</i>                                         | <i>Position</i> | <i>Glycan specificity</i>                                                                                  |
|----------------------------|-------------------------------------------------------|-----------------|------------------------------------------------------------------------------------------------------------|
| <b>O-Glycan</b>            |                                                       |                 |                                                                                                            |
| ACL                        | <i>Amaranthus caudatus</i> lectin                     | 2CD             | Gal $\beta$ 3GalNAc                                                                                        |
| BPA                        | <i>Bauhinia purpurea</i> agglutinin                   | 3AB             | Gal $\beta$ 3GalNAc                                                                                        |
| DISCOIDIN I                | <i>Dictyostelium discoideum</i> I                     | 4AB             | $\alpha$ GalNAc                                                                                            |
| GS-I                       | <i>Griffonia simplicifolia</i> I                      | 6GH             | $\alpha$ Gal, $\alpha$ 3GalNAc                                                                             |
| Jacalin; AIA               | Jacalin ( <i>Artocarpus intergrifolia</i> agglutinin) | 7AB             | Gal $\beta$ 3GalNAc                                                                                        |
| MPL                        | <i>Maclura pomifera</i> lectin                        | 8IJ             | Gal $\beta$ 3GalNAc                                                                                        |
| PNA                        | Peanut agglutinin                                     | 10CD            | Gal $\beta$ 3GalNAc                                                                                        |
| SJA                        | <i>Sophora japonica</i> agglutinin                    | 11GH            | $\beta$ GalNAc                                                                                             |
| SNA-II                     | <i>Sambucus nigra</i> agglutinin II                   | 11KL            | GalNAc > Gal                                                                                               |
| VVA                        | <i>Vicia villosa</i> agglutinin                       | 12KL            | GalNAc                                                                                                     |
| <b>N-Glycan</b>            |                                                       |                 |                                                                                                            |
| LcH A                      | <i>Lens Culinaris</i> hemagglutinin                   | 7EF             | $\alpha$ Man, $\alpha$ Glc, core with Fuca1-6                                                              |
| MALECTIN                   | Human malectin                                        | 8EF             | Glc2-N-biose                                                                                               |
| PHA-E                      | <i>Phaseolus vulgaris</i> Erythroagglutinin           | 9IJ             | Gal $\beta$ 4GlcNAc $\beta$ 2Man $\alpha$ 6(GlcNAc $\beta$ 4)(GlcNAc $\beta$ 4Man $\alpha$ 3)Man $\beta$ 4 |
| PHA-L                      | <i>Phaseolus vulgaris</i> Leucoagglutinin             | 9KL             | Gal $\beta$ 4GlcNAc $\beta$ 6(GlcNAc $\beta$ 2Man $\alpha$ 3)Man $\alpha$ 3                                |
| PHA-P                      | <i>Phaseolus vulgaris</i> Phytohemagglutinin          | 10AB            | Triantenary, tetraantenary structures                                                                      |
| PSA                        | <i>Pisum sativum</i> agglutinin                       | 10GH            | $\alpha$ Man, $\alpha$ Glc, core with Fuca1-6                                                              |
| <b>N-Acetyllactosamine</b> |                                                       |                 |                                                                                                            |
| CGL2                       | <i>Coprinopsis cinerea</i> lectin 2                   | 3EF             | $\beta$ Gal                                                                                                |
| CNL                        | <i>Clitocybe nebularis</i> lectin                     | 3GH             | $\alpha$ / $\beta$ GalNAc, GalNAc $\beta$ 1-4GlcNAc                                                        |
| ECA                        | <i>Erythrina crista-galli</i> agglutinin              | 4GH             | Gal $\beta$ 4GlcNAc                                                                                        |
| GAL1                       | Human galectin1                                       | 5AB             | Branched LacNAc, Gal                                                                                       |
| GAL1-S                     | Human galectin1-S                                     | 5CD             | Branched LacNAc                                                                                            |
| GAL2                       | Human galectin2                                       | 5EF             | Branched LacNAc                                                                                            |

|             |                                           |      |                                                |
|-------------|-------------------------------------------|------|------------------------------------------------|
| GAL3        | Human galectin3                           | 5GH  | poly LacNAc                                    |
| GAL3C-S     | Human galectin3C-S                        | 5IJ  | poly LacNAc                                    |
| GAL7-S      | Human galectin7-S                         | 5KL  | Gal $\beta$ 1-3GlcNAc                          |
| GAL9        | Human galectin9                           | 6AB  | poly LacNAc                                    |
| LSL-N       | <i>Laetiporus sulphureus</i> lectin       | 8AB  | LacNAc                                         |
| Fucose      |                                           |      |                                                |
| AAA         | <i>Anguilla anguilla</i> agglutinin       | 1IJ  | $\alpha$ Fuc                                   |
| AAL         | <i>Aleuria aurantia</i> lectin            | 1KL  | $\alpha$ Fuc                                   |
| BC2LCN      | <i>Burkholderia cenocepacia</i> lectin CN | 2KL  | Fuc $\alpha$ 1-2Gal $\beta$ 1-3GalNAc/GlcNAc   |
| LTL         | <i>Lotus tetragonolobus</i> lectin        | 7KL  | $\alpha$ 1-3Fuc (Lex)                          |
| PA-III      | <i>Pseudomonas aeruginosa</i> lectin II   | 9CD  | $\alpha$ Fuc, $\alpha$ Man                     |
| RS-FUC      | <i>Ralstonia solanacearum</i>             | 11AB | $\alpha$ Fuc                                   |
| UEA I       | <i>Ulex europaeus</i> agglutinin I        | 12EF | $\alpha$ 1-2Fuc                                |
| Sialic acid |                                           |      |                                                |
| ACG         | <i>Agroclybe cylindracea</i> galectin     | 2AB  | $\alpha$ 2-3 Sialic Acid                       |
| MAA         | <i>Maackia amurensis</i> agglutinin I     | 8CD  | Neu5Ac $\alpha$ 2-3Gal( $\beta$ 1-4)GlcNAc/Glc |
| PSL1A       | <i>Polyporus squamosus</i> lectin 1A      | 10IJ | $\alpha$ 2-6 Sialic Acid                       |
| SAMB        | <i>Sambucus sieboldiana</i>               | 11CD | NeuAc $\alpha$ 2-6Gal, GalNAc                  |
| SNA-I       | <i>Sambucus nigra</i> aagglutinin I       | 11IJ | Neu5Ac $\alpha$ 2-6Gal, GalNAc                 |
| Mannose     |                                           |      |                                                |
| ASA         | <i>Allium sativum</i> agglutinin          | 2EF  | $\alpha$ Man                                   |
| BANLEC      | <i>Musa acuminata</i> (banana lectin)     | 2GH  | $\alpha$ Man, $\alpha$ Glc                     |
| BC2L-A      | <i>Burkholderia cenocepacia</i> lectin A  | 2IJ  | High-mannose                                   |
| CALSEPA     | <i>Calystegia sepium</i> agglutinin       | 3CD  | High-mannose                                   |
| Con A       | Concanavalin A                            | 3IJ  | $\alpha$ Man, $\alpha$ Glc                     |
| GNA         | <i>Galanthus nivalis</i> agglutinin       | 6CD  | $\alpha$ Man                                   |
| GRFT        | <i>Griffithia</i> sp.                     | 6EF  | High-mannose                                   |
| HHA         | <i>Hippeastrum hybrid</i> agglutinin      | 6KL  | $\alpha$ Man                                   |
| LENTIL      | Lentil                                    | 7IJ  | $\alpha$ Man, $\alpha$ Glc                     |

|         |                                             |      |              |
|---------|---------------------------------------------|------|--------------|
| NPA     | <i>Narcissus pseudonarcissus</i> agglutinin | 8KL  | $\alpha$ Man |
| ORYSATA | <i>Oryza sativa</i> agglutinin              | 9AB  | High-mannose |
| PALa    | <i>Phlebotidium aureum</i> lectin           | 9GH  | High-mannose |
| VFA     | <i>Vicia faba</i> agglutinin                | 12IJ | $\alpha$ Man |

#### N-Acetylglucosamine

|        |                                           |      |                          |
|--------|-------------------------------------------|------|--------------------------|
| DSA    | <i>Datura stramonium</i> agglutinin       | 4EF  | GlcNAc                   |
| F17AG  | <i>Escherichia coli</i>                   | 4KL  | GlcNAc                   |
| GS-II  | <i>Griffonia simplicifolia</i> II         | 6IJ  | $\alpha/\beta$ GlcNAc    |
| LEA    | <i>Lycopersicon esculentum</i> agglutinin | 7GH  | GlcNAc                   |
| STL    | <i>Solanum tuberosum</i> lectin           | 12AB | GlcNAc                   |
| UDA    | <i>Urtica dioica</i> agglutinin           | 12GH | Poly $\beta$ (1,4)GlcNAc |
| UEA-II | <i>Ulex europaeus</i> agglutinin II       | 12CD | GlcNAc                   |
| WGA    | Wheat germ agglutinin                     | 13CD | GlcNAc, Sialic acid      |

#### Galactose and N-acetylgalactosamine

|              |                                           |      |                                                            |
|--------------|-------------------------------------------|------|------------------------------------------------------------|
| DBA          | <i>Dolichos biflorus</i> agglutinin       | 3KL  | $\alpha$ GalNAc                                            |
| DISCOIDIN II | <i>Dictyostelium discoideum</i> II        | 4CD  | Gal, LacNAc                                                |
| EEL          | <i>Eunonymus europaeus</i> lectin         | 4IJ  | Gal $\alpha$ 3Gal                                          |
| LBA          | <i>Phaseolus lunatus</i> agglutinin       | 7CD  | GalNAc $\alpha$ (1,3)[ $\alpha$ Fuc(1,2)]Gal               |
| MOA          | <i>Marasmius oreades</i> agglutinin       | 8GH  | Gal $\alpha$ 1-3Gal $\beta$ 1-4GlcNAc, Gal $\alpha$ 1-3Gal |
| PA-IL        | <i>Pseudomonas aeruginosa</i> lectin I    | 9EF  | Gal $\alpha$ 1-3(4)Gal                                     |
| PPL          | <i>Pleurocybella porrigens</i> lectin     | 10EF | $\alpha/\beta$ GalNAc                                      |
| PTL          | <i>Psophocarpus tetragonolobus</i> lectin | 10KL | GalNAc, Gal                                                |
| SBA          | Soybean agglutinin                        | 11EF | $\alpha > \beta$ GalNAc                                    |
| WFA          | <i>Wisteria floribunda</i> agglutinin     | 13AB | GalNAc                                                     |

**Supplementary Table S2.** Quantile-normalized fluorescence intensity of lectin binding to cell surface proteins isolated from human and mouse corneas. The coefficient of variation (CV) was calculated to measure the dispersion of the quantile-normalized intensity. Principal component analysis (PCA) was used to reduce the dimensionality of the datasets. Data in red denotes values with a CV higher than 30% and loading values for PC1, PC2 and PC3 > 0.80 or < -0.80. Schematic of the structures recognized by each lectin are shown.

|                                                                                     | Lectin       | Normalized intensity |              |        |              |             |           | CV (%) | Loading values |       |       |
|-------------------------------------------------------------------------------------|--------------|----------------------|--------------|--------|--------------|-------------|-----------|--------|----------------|-------|-------|
|                                                                                     |              | Limbal epi.          | Central epi. | Stroma | Prim. fibro. | Prim. endo. | Ms cornea |        | PC1            | PC2   | PC3   |
|    | ACL          | 0.50                 | 0.29         | 0.26   | 0.36         | 1.32        | 0.29      | 80.95  | -0.16          | 0.62  | -0.01 |
|    | BPA          | 1.24                 | 0.68         | 0.59   | 0.65         | 0.68        | 0.77      | 30.84  | -0.93          | -0.15 | 0.04  |
|    | DISCOIDIN I  | 3.80                 | 1.37         | 1.00   | 1.32         | 0.50        | 1.04      | 77.58  | -0.80          | -0.30 | -0.26 |
|    | GS-I         | 0.29                 | 0.22         | 0.31   | 0.36         | 0.29        | 0.30      | 14.64  | 0.27           | 0.31  | -0.09 |
|    | Jacalin; AIA | 1.10                 | 0.72         | 0.44   | 0.77         | 0.65        | 0.87      | 28.99  | -0.88          | 0.16  | 0.40  |
|    | MPL          | 0.23                 | 0.23         | 0.15   | 0.17         | 0.21        | 0.14      | 22.33  | -0.67          | 0.25  | -0.34 |
|    | PNA          | 0.80                 | 0.63         | 0.63   | 0.59         | 0.55        | 0.89      | 19.37  | -0.45          | -0.58 | 0.53  |
|    | SJA          | 0.17                 | 0.15         | 0.18   | 0.02         | 0.18        | 0.17      | 43.92  | -0.09          | -0.67 | 0.13  |
|   | SNA-II       | 0.11                 | 0.11         | 0.12   | 0.12         | 0.11        | 0.11      | 5.26   | 0.58           | 0.11  | -0.54 |
|  | LcH A        | 0.53                 | 0.77         | 0.77   | 0.44         | 2.66        | 0.55      | 88.92  | 0.29           | 0.29  | -0.02 |
|  | MALECTIN     | 1.00                 | 0.87         | 0.57   | 0.53         | 0.63        | 3.24      | 91.92  | -0.22          | -0.44 | 0.86  |
|  | PHA-E        | 0.74                 | 1.04         | 0.93   | 2.33         | 1.04        | 0.80      | 51.57  | 0.30           | 0.74  | -0.20 |
|  | PHA-L        | 0.57                 | 0.74         | 0.29   | 0.63         | 0.89        | 0.65      | 31.95  | -0.36          | 0.62  | 0.53  |
|  | PHA-P        | 3.47                 | 2.66         | 1.24   | 0.93         | 0.87        | 1.32      | 60.87  | -0.79          | -0.52 | -0.16 |
|  | PSA          | 0.63                 | 0.65         | 1.37   | 0.89         | 1.00        | 1.24      | 31.49  | 0.84           | -0.20 | 0.22  |

|   |         |      |      |      |      |      |      |       |       |       |       |
|---|---------|------|------|------|------|------|------|-------|-------|-------|-------|
|   | CGL2    | 0.27 | 0.44 | 2.07 | 1.24 | 0.77 | 0.74 | 70.86 | 0.93  | 0.05  | -0.19 |
|   | CNL     | 0.10 | 0.08 | 0.11 | 0.14 | 0.12 | 0.10 | 17.08 | 0.33  | 0.66  | -0.15 |
|   | ECA     | 0.26 | 0.30 | 0.27 | 0.29 | 0.29 | 0.33 | 8.71  | 0.27  | 0.04  | 0.90  |
|   | GAL1    | 0.05 | 0.04 | 0.08 | 0.08 | 0.05 | 0.06 | 31.89 | 0.55  | 0.05  | -0.14 |
|   | GAL1-S  | N/D  | N/D  | N/D  | N/D  | N/D  | N/D  |       |       |       |       |
|   | GAL2    | 0.19 | 0.17 | 0.17 | 0.18 | 0.23 | 0.25 | 17.60 | 0.02  | 0.16  | 0.81  |
|   | GAL3    | N/D  | N/D  | N/D  | N/D  | N/D  | N/D  |       |       |       |       |
| n |         |      |      |      |      |      |      |       |       |       |       |
|   | GAL3C-S | 0.15 | 0.19 | 0.50 | 0.20 | 0.19 | 0.53 | 59.42 | 0.67  | -0.58 | 0.33  |
| n |         |      |      |      |      |      |      |       |       |       |       |
|   | GAL7-S  | 0.25 | 0.25 | 0.20 | 0.38 | 0.36 | 0.18 | 30.89 | -0.08 | 0.95  | -0.28 |
|   | GAL9    | N/D  | N/D  | N/D  | N/D  | N/D  | N/D  |       |       |       |       |
| n |         |      |      |      |      |      |      |       |       |       |       |
|   | LSL-N   | 0.33 | 0.20 | 0.53 | 0.23 | 0.26 | 0.19 | 43.99 | 0.22  | -0.37 | -0.77 |
|   | AAA     | 0.12 | 0.29 | 0.19 | 0.15 | 0.14 | 0.15 | 36.63 | 0.26  | -0.33 | -0.10 |
|   | AAL     | 2.15 | 1.81 | 1.04 | 0.87 | 0.59 | 1.00 | 48.30 | -0.71 | -0.54 | -0.22 |
|   | BC2LCN  | 0.91 | 0.53 | 0.65 | 0.29 | 0.20 | 0.20 | 61.83 | -0.44 | -0.52 | -0.72 |
|   | LTL     | 0.06 | 0.06 | 0.06 | 0.11 | 0.06 | 0.08 | 27.41 | 0.26  | 0.53  | 0.28  |
|   | PA-IIL  | N/D  | N/D  | N/D  | N/D  | N/D  | N/D  |       |       |       |       |
|   | RS-FUC  | 2.86 | 1.51 | 1.10 | 1.00 | 0.74 | 1.20 | 54.11 | -0.84 | -0.47 | -0.18 |
|   | UEA I   | 2.33 | 1.24 | 0.89 | 0.74 | 0.72 | 1.10 | 51.59 | -0.87 | -0.49 | -0.06 |

|                                                                                                   |         |      |      |      |      |      |      |       |       |       |       |
|---------------------------------------------------------------------------------------------------|---------|------|------|------|------|------|------|-------|-------|-------|-------|
| <br>$\alpha$ 2-3 | ACG     | 0.36 | 0.36 | 0.36 | 0.57 | 0.53 | 0.29 | 27.11 | 0.19  | 0.90  | -0.39 |
| <br>$\alpha$ 2-3 | MAA     | 0.59 | 0.80 | 0.72 | 2.15 | 2.33 | 0.41 | 72.30 | 0.26  | 0.90  | -0.30 |
| <br>$\alpha$ 2-6 | PSL1A   | 6.29 | 2.15 | 1.51 | 2.66 | 2.07 | 2.07 | 62.74 | -0.94 | 0.11  | -0.14 |
| <br>$\alpha$ 2-6 | SAMB    | 0.68 | 0.41 | 0.48 | 0.48 | 0.41 | 0.44 | 21.06 | -0.71 | -0.20 | -0.38 |
| <br>$\alpha$ 2-6 | SNA-I   | 1.51 | 1.00 | 0.80 | 0.80 | 0.80 | 0.93 | 28.37 | -0.94 | -0.33 | -0.06 |
|                  | ASA     | 1.61 | 3.47 | 5.23 | 3.24 | 2.15 | 2.33 | 43.08 | 0.77  | -0.26 | -0.38 |
|                  | BANLEC  | 2.66 | 5.23 | 3.47 | 5.23 | 3.47 | 5.23 | 27.35 | 0.37  | 0.17  | 0.54  |
|                  | BC2L-A  | 0.48 | 0.50 | 0.74 | 0.68 | 0.57 | 0.36 | 25.05 | 0.49  | 0.28  | -0.82 |
|                  | CALSEPA | 0.72 | 1.61 | 1.20 | 1.81 | 1.81 | 0.57 | 42.44 | 0.37  | 0.63  | -0.46 |
|                 | Con A   | 3.24 | 4.22 | 3.24 | 3.80 | 3.24 | 3.80 | 11.46 | 0.00  | 0.04  | 0.44  |
|                | GNA     | 5.23 | 6.29 | 6.29 | 6.29 | 6.29 | 6.29 | 7.04  | 0.87  | 0.18  | 0.28  |
|                | GRFT    | 1.04 | 3.80 | 2.15 | 4.22 | 3.80 | 3.47 | 39.78 | 0.59  | 0.48  | 0.44  |
|                | HHL     | 1.81 | 2.33 | 3.80 | 1.61 | 1.37 | 2.66 | 39.41 | 0.43  | -0.87 | -0.06 |
|                | LENTIL  | 0.65 | 1.20 | 1.32 | 1.37 | 1.20 | 1.37 | 23.03 | 0.88  | 0.15  | 0.32  |
|                | NPA     | 1.32 | 2.07 | 2.66 | 1.04 | 1.24 | 2.15 | 36.62 | 0.41  | -0.88 | 0.10  |
|                | ORYSATA | 0.87 | 1.32 | 4.22 | 1.20 | 2.86 | 2.86 | 58.71 | 0.83  | -0.30 | 0.16  |
|                | PALa    | 0.55 | 0.59 | 1.61 | 0.72 | 1.61 | 1.51 | 48.01 | 0.76  | -0.12 | 0.28  |
|                | VFA     | 0.08 | 0.10 | 0.14 | 0.06 | 0.06 | 0.06 | 36.59 | 0.19  | -0.67 | -0.66 |

|                                                                                     |              |      |      |      |      |      |      |       |       |       |       |
|-------------------------------------------------------------------------------------|--------------|------|------|------|------|------|------|-------|-------|-------|-------|
|    | DSA          | 1.20 | 1.10 | 2.86 | 1.51 | 1.51 | 1.61 | 38.96 | 0.78  | -0.33 | -0.27 |
|    | F17AG        | 0.91 | 3.24 | 0.68 | 2.07 | 1.10 | 0.68 | 70.33 | -0.16 | 0.44  | -0.13 |
|    | GS-II        | 0.77 | 0.55 | 0.38 | 0.55 | 0.48 | 0.59 | 23.42 | -0.94 | 0.07  | 0.27  |
|    | LEA          | 0.21 | 0.31 | 0.33 | 0.19 | 0.22 | 0.27 | 22.82 | 0.43  | -0.78 | 0.00  |
|    | STL          | 2.07 | 0.89 | 2.33 | 2.86 | 5.23 | 1.81 | 58.33 | 0.27  | 0.59  | -0.12 |
|    | UDA          | 0.30 | 0.48 | 0.87 | 0.26 | 0.27 | 0.22 | 61.76 | 0.40  | -0.58 | -0.67 |
|    | UEA-II       | 0.41 | 0.27 | 0.29 | 0.30 | 0.30 | 0.31 | 15.68 | -0.75 | -0.07 | -0.11 |
|    | WGA          | 0.22 | 0.21 | 0.22 | 0.22 | 0.25 | 0.26 | 8.23  | 0.22  | 0.11  | 0.72  |
|    | DBA          | 4.22 | 2.86 | 1.81 | 3.47 | 4.22 | 4.22 | 28.35 | -0.59 | 0.48  | 0.59  |
|    | DISCOIDIN II | 0.38 | 0.38 | 0.30 | 0.50 | 0.44 | 0.48 | 17.53 | -0.12 | 0.71  | 0.65  |
|    | EEL          | 0.36 | 0.36 | 0.41 | 0.27 | 0.36 | 0.50 | 19.93 | 0.14  | -0.75 | 0.52  |
|    | LBA          | 0.29 | 0.57 | 0.23 | 0.41 | 0.33 | 0.36 | 32.35 | -0.17 | 0.33  | 0.36  |
|   | MOA          | 1.37 | 0.93 | 0.55 | 1.10 | 0.93 | 0.72 | 30.61 | -0.84 | 0.53  | -0.10 |
|  | PA-IL        | 0.14 | 0.12 | 0.06 | 0.25 | 0.15 | 0.63 | 92.51 | -0.13 | 0.22  | 0.90  |
|  | PPL          | 0.20 | 0.14 | 0.10 | 0.21 | 0.17 | 0.12 | 27.20 | -0.60 | 0.76  | -0.14 |
|  | PTL          | 0.18 | 0.18 | 0.25 | 0.10 | 0.10 | 0.38 | 52.77 | 0.09  | -0.87 | 0.44  |
|  | SBA          | 0.44 | 0.33 | 0.21 | 0.31 | 0.31 | 0.21 | 28.88 | -0.83 | 0.39  | -0.34 |
|  | WFA          | 0.31 | 0.26 | 0.36 | 0.33 | 0.38 | 0.23 | 18.39 | 0.24  | 0.43  | -0.72 |

N/D: Not detected. VVA binding was saturated and excluded from the analysis.
